# Supplementary material for: Tailoring cysteine detection in colorimetric techniques using Co/Fe-functionalized mesoporous silica nanoparticles
Source: Royal Society of Chemistry journal article supplement (doi:10.1039/d1tb00157d), 2021-01-01
Supplement: d1tb00157d1.pdf [file d1tb00157d1.pdf]

## Supporting information

### **Tailoring Cysteine Detection in Colorimetric Technique Using Co/Fe-Functionalized Mesoporous Silica Nanoparticles**

**M. Aghayan<sup>a</sup>, A.Mahmoudi<sup>a,\*</sup>, M. Reza Sazegar<sup>a</sup>, F. Adhami<sup>b</sup>**

<sup>a</sup>Dept. of Chemistry, Faculty of science, Islamic Azad University, North Tehran Branch, Tehran, Iran

<sup>b</sup>Dep. of chemistry, Faculty of science, Islamic Azad University, Yadegar-e-Imam Khomeini (RAH), Shahre rey Branch, Tehran, Iran.

\* Corresponding Authors

E-mail: mahmoudiali.ac@gmail.com

Tel.: +98 9123377127

E-mail: m\_r\_sazegar@yahoo.com

Tel.: +98 9120335814

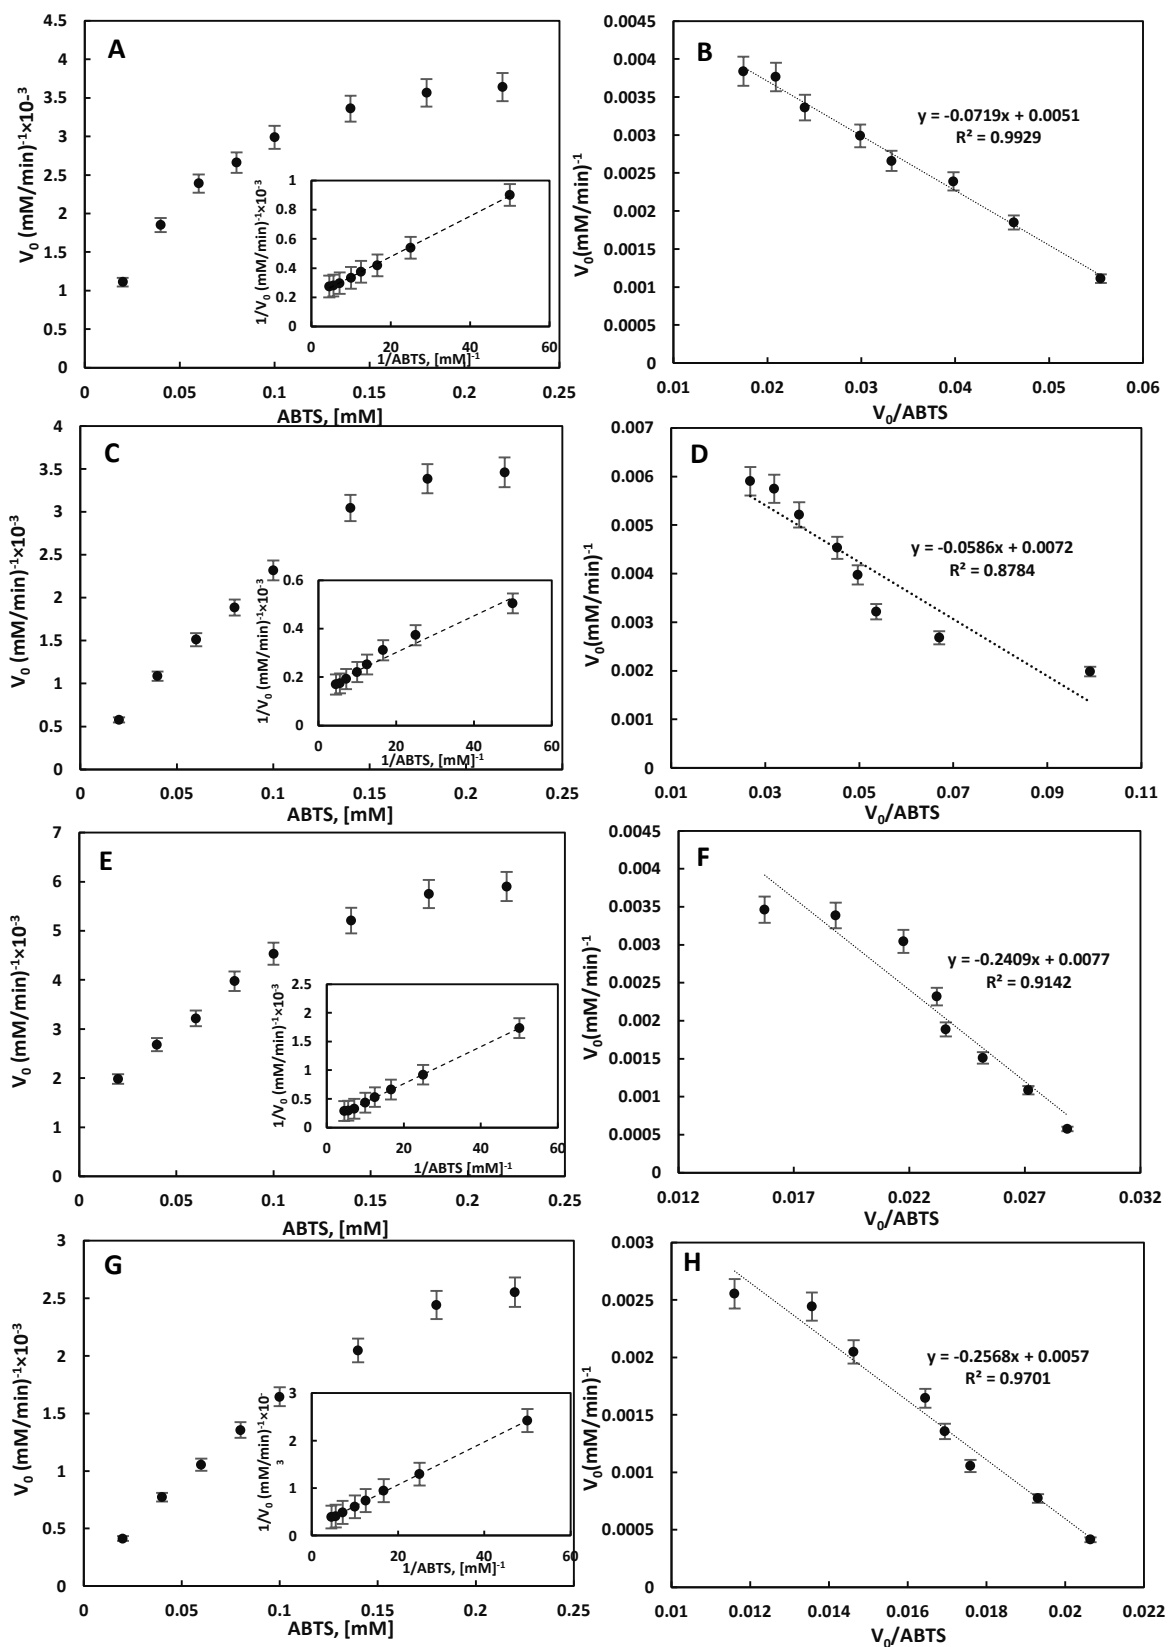

**Fig. S1** Steady-state kinetic analyses using Michaelis–Menten model, Eadie-Hofstee and Lineweaver–Burk model (insets) for Fe-MSN (A, B), Co/Fe-MSN (1%) (C, D), Co/Fe-MSN (3%) (E, F), Co/Fe-MSN (5%) (G, H) for variation of ABTS concentration at constant H<sub>2</sub>O<sub>2</sub> concentration (0.5 mM).

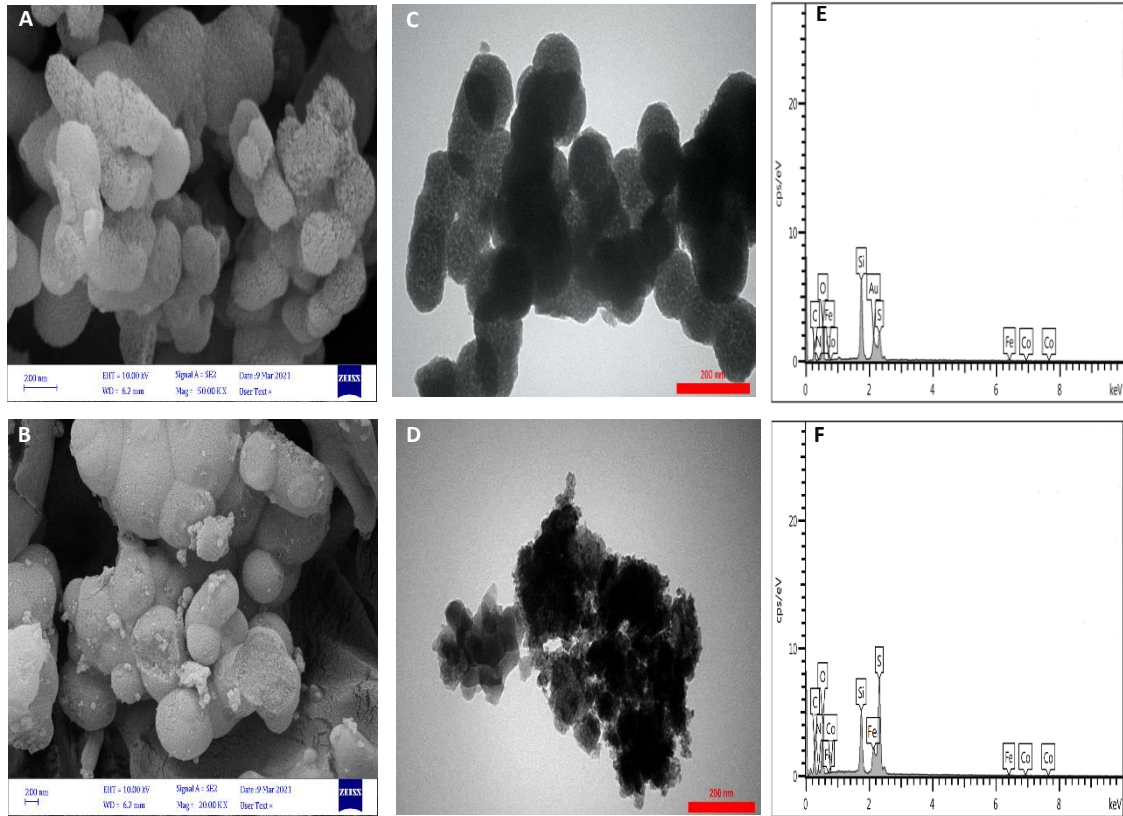

**Fig. S2** TEM images of Co/Fe-MSN after incubated with Cys 500 nM

**Table S1.** Comparison of Si/Fe mole ratio dependent apparent Kinetic data for peroxidase-like activity.

| <b>Catalyst</b>   | <b><math>k_m(\text{mM})</math></b> | <b><math>V_{\text{max}}(\text{mM}\cdot\text{S}^{-1})</math></b> | <b><math>k_{\text{cat}}(\text{S}^{-1})</math></b> | <b><math>K_{\text{cat}}/k_m(\text{mM}^{-1}\cdot\text{S}^{-1})</math></b> |
|-------------------|------------------------------------|-----------------------------------------------------------------|---------------------------------------------------|--------------------------------------------------------------------------|
| <b>Fe-MSN(10)</b> | 0.0719                             | $8.5\times 10^{-5}$                                             | $4.5\times 10^{-2}$                               | $6.2\times 10^{-1}$                                                      |
| <b>Fe-MSN(30)</b> | 0.0923                             | $7\times 10^{-5}$                                               | $2.8\times 10^{-2}$                               | $3\times 10^{-1}$                                                        |
| <b>Fe-MSN(50)</b> | 2.94                               | $1.23\times 10^{-5}$                                            | $8.6\times 10^{-3}$                               | $2.9\times 10^{-3}$                                                      |

**Table S2.** Comparative rate constants value for HRP and as-prepared catalysts.

| <b>Catalyst</b> | <b><math>k_1(\text{M}^{-1}\text{s}^{-1})</math></b> | <b><math>K_3(\text{M}^{-1}\text{s}^{-1})</math></b> |
|-----------------|-----------------------------------------------------|-----------------------------------------------------|
| HRP             | $5.37 \times 10^7$                                  | $3.03 \times 10^5$                                  |
| Co/Fe-MSN (1%)  | $4.41 \times 10^3$                                  | $2.65 \times 10^2$                                  |
| Co/Fe-MSN (3%)  | $2.53 \times 10^3$                                  | $1.13 \times 10^2$                                  |
| Co/Fe-MSN (5%)  | $8.75 \times 10^3$                                  | $5.43 \times 10^2$                                  |
| Fe-MSN          | $7.29 \times 10^2$                                  | $3.32 \times 10^1$                                  |

**Table S3** Determination results of real samples with different concentrations of cys (n=6)

| <b>Samples</b> | <b>Added (<math>\mu\text{M}</math>)</b> | <b>Found (<math>\mu\text{M}</math>)</b> | <b>Recovery (%)</b> | <b>RSD(%)</b> |
|----------------|-----------------------------------------|-----------------------------------------|---------------------|---------------|
| <b>1</b>       | 5                                       | 4.91 $\pm$ 0.092                        | 98.2                | 1.17          |
|                | 10                                      | 9.93 $\pm$ 0.098                        | 99.3                | 1.01          |
| <b>2</b>       | 5                                       | 4.98 $\pm$ 0.054                        | 99.6                | 1.23          |
|                | 10                                      | 9.91 $\pm$ 0.078                        | 99.1                | 0.88          |
| <b>3</b>       | 5                                       | 4.93 $\pm$ 0.064                        | 98.6                | 1.42          |
|                | 10                                      | 9.96 $\pm$ 0.091                        | 99.6                | 0.91          |

**Table S4.** Comparison of apparent Kinetic data of Co/Fe-MSN (1%) with or without cys for peroxidase-like activity.

| <b>Catalyst</b>              | <b><math>k_m(\text{mM})</math></b> | <b><math>V_{\text{max}}(\text{mM}\cdot\text{S}^{-1})</math></b> | <b><math>k_{\text{cat}}(\text{S}^{-1})</math></b> | <b><math>K_{\text{cat}}/k_m(\text{mM}^{-1}\cdot\text{S}^{-1})</math></b> |
|------------------------------|------------------------------------|-----------------------------------------------------------------|---------------------------------------------------|--------------------------------------------------------------------------|
| Co/Fe-MSN(1%)                | $2.06\times 10^{-4}$               | 0.0586                                                          | $1.2\times 10^{-4}$                               | $5.3\times 10^{-1}$                                                      |
| Co/Fe-MSN(1%) with 50 nM cys | $1.36\times 10^{-1}$               | $7.6\times 10^{-5}$                                             | $2.8\times 10^{-5}$                               | $2\times 10^{-4}$                                                        |
